# Supplementary material for: Bat Astrovirus in Mozambique
Source: Springer Nature journal article supplement (doi:10.1186/s12985-018-1011-x), 2018-06-20
Supplement: MOESM2 [file 15862168]

| <b>Family</b>    | <b>Species</b>                    |
|------------------|-----------------------------------|
| Emballonuridae   | <i>Coleura afra</i>               |
| Hipposideridae   | <i>Hipposideros armiger</i>       |
|                  | <i>Hipposideros caffer</i>        |
|                  | <i>Hipposideros gigas</i>         |
|                  | <i>Hipposideros larvatus</i>      |
| Miniopteridae    | <i>Miniopterus fuliginosus</i>    |
|                  | <i>Miniopterus griveaudi</i>      |
|                  | <i>Miniopterus inflatus</i>       |
|                  | <i>Miniopterus magnater</i>       |
|                  | <i>Miniopterus mossambicus</i>    |
|                  | <i>Miniopterus pusillus</i>       |
|                  | <i>Miniopterus schreibersii</i>   |
| Molossidae       | <i>Mops condylurus</i>            |
| Nycteridae       | <i>Nycteris thebaica</i>          |
| Pteropodidae     | <i>Rousettus madagascariensis</i> |
| Rhinolophidae    | <i>Rhinolophus affinis</i>        |
|                  | <i>Rhinolophus ferrumequinum</i>  |
|                  | <i>Rhinolophus hipposideros</i>   |
|                  | <i>Rhinolophus pearsonii</i>      |
|                  | <i>Rhinolophus pusillus</i>       |
|                  | <i>Rhinolophus rouxii</i>         |
|                  | <i>Rhinolophus sinicus</i>        |
| Rhinonycteridae  | <i>Paratriaenops furculus</i>     |
|                  | <i>Triaenops afer</i>             |
|                  | <i>Triaenops menamena</i>         |
| Vespertilionidae | <i>Myotis chinensis</i>           |
|                  | <i>Myotis daubentonii</i>         |
|                  | <i>Myotis emarginatus</i>         |
|                  | <i>Myotis goudoti</i>             |
|                  | <i>Myotis horsfieldii</i>         |
|                  | <i>Myotis myotis</i>              |
|                  | <i>Myotis mystacinus</i>          |
|                  | <i>Myotis ricketti</i>            |
|                  | <i>Nyctalus noctula</i>           |
|                  | <i>Pipistrellus pipistrellus</i>  |
|                  | <i>Scotophilus kuhlii</i>         |
|                  | <i>Tylonycteris robustula</i>     |
|                  | <i>Vespertilio murinus</i>        |
